# Supplementary material
Source: PubMed Central journal article supplement (PMC7965431)
Supplement: 3524_tables.pdf [file 3524_tables.pdf]

**On-line Table 1: Demographic and clinical characteristics of the HPV-positive and HPV-negative groups**

| Variable                    | HPV+ (n = 68) |      | HPV- (n = 68) |      | P Value |
|-----------------------------|---------------|------|---------------|------|---------|
|                             | N             | %    | N             | %    |         |
| Age category                |               |      |               |      | 1.0     |
| <55 years                   | 34            | 50.0 | 34            | 50.0 |         |
| ≥55 years                   | 34            | 50.0 | 34            | 50.0 |         |
| Mean (range)                | 52 (39–74)    |      | 64 (40–73)    |      |         |
| Sex                         |               |      |               |      | .015    |
| Male                        | 61            | 89.7 | 50            | 73.5 |         |
| Female                      | 7             | 10.3 | 18            | 26.5 |         |
| Race/ethnicity              |               |      |               |      | .771    |
| Non-Hispanic white          | 62            | 91.2 | 61            | 89.7 |         |
| Other                       | 6             | 8.8  | 7             | 10.3 |         |
| Smoking status <sup>a</sup> |               |      |               |      | 1.0     |
| Current smoker              | 20            | 29.4 | 20            | 29.4 |         |
| Former smoker               | 22            | 32.4 | 22            | 32.4 |         |
| Never-smoker                | 26            | 38.2 | 26            | 38.2 |         |
| Alcohol drinking status     |               |      |               |      | .377    |
| Current drinker             | 33            | 48.5 | 41            | 60.3 |         |
| Former drinker              | 14            | 20.6 | 10            | 14.7 |         |
| Never-drinker               | 21            | 30.9 | 17            | 25.0 |         |
| Tumor subsite <sup>a</sup>  |               |      |               |      | 1.0     |
| Tonsil                      | 40            | 58.8 | 40            | 58.8 |         |
| Base of tongue              | 28            | 41.2 | 28            | 41.2 |         |
| Tumor category <sup>a</sup> |               |      |               |      | 1.0     |
| T1                          | 22            | 32.4 | 22            | 32.4 |         |
| T2                          | 29            | 42.6 | 29            | 42.6 |         |
| T3                          | 9             | 13.2 | 9             | 13.2 |         |
| T4                          | 8             | 11.8 | 8             | 11.8 |         |
| Nodal category              |               |      |               |      | 1.0     |
| N0                          | 7             | 10.3 | 7             | 10.3 |         |
| N1–2                        | 61            | 89.7 | 61            | 89.7 |         |
| N3                          | 0             | 0.0  | 0             | 0.0  |         |
| Stage                       |               |      |               |      | 1.0     |
| I–II                        | 5             | 7.4  | 4             | 5.9  |         |
| III–IV                      | 63            | 92.6 | 64            | 94.1 |         |
| Grade <sup>b</sup>          |               |      |               |      | .683    |
| Well differentiated         | 1             | 1.6  | 2             | 3.2  |         |
| Moderately differentiated   | 26            | 41.3 | 22            | 35.5 |         |
| Poorly differentiated       | 36            | 57.1 | 38            | 61.3 |         |

<sup>a</sup> Matched variables (smoking status, subsite, and T-category).

<sup>b</sup> Grade was not recorded in 5 HPV+ and 6 HPV-. For this analysis, moderately well-differentiated tumors (n = 0 HPV+ and 1 HPV-) were included in the well-differentiated group and moderately-poorly-differentiated (n = 3 HPV+ and 5 HPV-) were included in the poorly differentiated group.

**On-line Table 2: Matched-pair analysis of imaging characteristics associated with HPV status**

| HPV+                                       | Matched Pairs           |                        | Imaging Finding Associated With HPV+ (95% Confidence Interval) | P Value <sup>a</sup> |
|--------------------------------------------|-------------------------|------------------------|----------------------------------------------------------------|----------------------|
|                                            | HPV-                    |                        |                                                                |                      |
|                                            | Imaging Finding Present | Imaging Finding Absent |                                                                |                      |
| Primary visible (61 pairs)                 |                         |                        |                                                                |                      |
| No                                         | 10                      | 2                      |                                                                |                      |
| Yes                                        | 43                      | 6                      | 0.6 (0.18–1.82)                                                | .317                 |
| Primary enhancing (43 pairs)               |                         |                        |                                                                |                      |
| No                                         | 6                       | 2                      |                                                                |                      |
| Yes                                        | 25                      | 9                      | 1.5 (0.48–5.12)                                                | .439                 |
| Primary well defined (43 pairs)            |                         |                        |                                                                |                      |
| No                                         | 6                       | 4                      |                                                                |                      |
| Yes                                        | 19                      | 13                     | 2.2 (0.77–6.95)                                                | .108                 |
| Primary is exophytic (43 pairs)            |                         |                        |                                                                |                      |
| No                                         | 6                       | 23                     |                                                                |                      |
| Yes                                        | 1                       | 12                     | 2.0 (0.69–6.49)                                                | .157                 |
| Primary with submucosal spread (43 pairs)  |                         |                        |                                                                |                      |
| No                                         | 5                       | 12                     |                                                                |                      |
| Yes                                        | 17                      | 8                      | 1.6 (0.46–6.22)                                                | .405                 |
| Primary invades adjacent muscle (43 pairs) |                         |                        |                                                                |                      |
| No                                         | 10                      | 30                     |                                                                |                      |
| Yes                                        | 2                       | 0                      | 0.0 (0–0.45)                                                   | .002                 |
| Metastatic lymph nodes visible (59 pairs)  |                         |                        |                                                                |                      |
| No                                         | 5                       | 2                      |                                                                |                      |
| Yes                                        | 45                      | 7                      | 1.4 (0.38–5.59)                                                | .564                 |
| Metastatic lymph nodes cystic (45 pairs)   |                         |                        |                                                                |                      |
| No                                         | 2                       | 29                     |                                                                |                      |
| Yes                                        | 3                       | 11                     | 5.5 (1.2–51.07)                                                | .013                 |
| Metastatic lymph nodes necrotic (45 pairs) |                         |                        |                                                                |                      |
| No                                         | 6                       | 7                      |                                                                |                      |
| Yes                                        | 30                      | 2                      | 0.3 (0.03–1.86)                                                | .157                 |
| Metastatic lymph nodes with ECS (45 pairs) |                         |                        |                                                                |                      |
| No                                         | 8                       | 22                     |                                                                |                      |
| Yes                                        | 6                       | 9                      | 1.1 (0.39–3.35)                                                | .808                 |
| Node of Rouvier involved (45 pairs)        |                         |                        |                                                                |                      |
| No                                         | 5                       | 32                     |                                                                |                      |
| Yes                                        | 2                       | 6                      | 1.2 (0.31–4.97)                                                | .763                 |

<sup>a</sup> McNemar  $\chi^2$  test.
